# Supplementary material
Source: HighWire-hosted journal article supplement (https://le.uwpress.org/highwire/filestream/2910/field_highwire_adjunct_files/1/LE-96-4-04-Liu-appB.pdf)
Supplement: LE-96-4-04-Liu-appB.pdf [file LE-96-4-04-Liu-appB.pdf]

### Appendix B: Sample questions from the farmer survey regarding management costs

- What plant population did you plant on this field for this most recent crop?

Quantity: \_\_\_\_\_ seeds/acre

Price: \_\_\_\_\_ \$/10,000 seeds

- Did you apply manure on this field for this most recent crop?

No

Yes →source of manure (check all that apply)

Dairy  Swine  Poultry

Quantity: \_\_\_\_\_ lbs/acre

Price: \_\_\_\_\_ \$/lb

- Considering all fertilizers on this field for this most recent crop, how much phosphorus and nitrogen was applied and what was the price you paid? (*Please write '0' if none was applied*)

Rate (lbs/acre):      Phosphorus      Nitrogen  
\_\_\_\_\_

Price (\$/ton):      \_\_\_\_\_

Form (P):       MAP     DAP     APP

Form (N):       Urea     UAN     NH3

- How much in total did you spend on herbicide, insecticide, and fungicide for this field last year? Please select the **costs per acre** that best approximate your situation with this field.

\$10    \$15    \$20    \$30

\$40    \$50    \$60    \$80

- Is this field covered by any Federal Crop Insurance program?

No       Yes

- Do you rent this field?

No

Yes→ Who is primarily responsible for nutrient management decisions? (*Check one*)

Me alone

Primarily me, with landlord input

Equally me and my landlord

Primarily my landlord, with my input

My landlord alone

Other \_\_\_\_\_

*Land Economics* 96(4), November 2020

“Best Management Practices and Nutrient Reduction: An Integrated Economic-Hydrologic Model of the Western Lake Erie Basin” by Hongxing Liu, Wendong Zhang, Elena Irwin, Jeffrey Kast, Noel Aloysius, Jay Martin, and Margaret Kalcic

→What is your rental agreement with your landlord? (*Check all that apply*)

- Rent for cash
- Rent for a share of crop

- Tell us more about the machinery and equipment you used on this field last year:  
Horsepower of your largest tractor \_\_\_\_\_  
Horsepower of combine harvester \_\_\_\_\_  
Number of rows in planter \_\_\_\_\_

*For more details, please refer to the descriptive report about the survey on this project website:*  
<http://ohioseagrant.osu.edu/archive/maumeebay/project/resources/> (*Burnett et al. 2015*).
